# Supplementary material
Source: PubMed Central journal article supplement (PMC3968799)

**Supplementary Table 2. Polygenic overlap between cognitive alleles (derived from COGENT meta-analysis using  $p < 0.5$  threshold) and schizophrenia in four case-control cohorts.**

| <b>SCZ Dataset</b>           | <b># overlapping SNPs</b> | <b><math>R^2</math> for SCZ</b> | <b>p value</b>       | <b>direction</b> |
|------------------------------|---------------------------|---------------------------------|----------------------|------------------|
| <b>MGS European-American</b> | 25,653                    | 0.45 %                          | $3.7 \times 10^{-7}$ | negative         |
| <b>Japan</b>                 | 9,520                     | 0.34%                           | 0.052                | negative         |
| <b>Ashkenazi Jewish</b>      | 22,588                    | 0.10 %                          | 0.100                | negative         |
| <b>MGS African-American</b>  | 25,878                    | 0.00 %                          | 0.869                | negative         |
| <b>Meta-analysis</b>         |                           |                                 | $3.8 \times 10^{-7}$ | negative         |

**Supplementary Table 3. Polygenic overlap between cognitive alleles (derived from COGENT meta-analysis, excluding the IBG cohort, using  $p < 0.3$  threshold) and schizophrenia in four case-control cohorts.**

| <b>SCZ Dataset</b>           | <b># overlapping SNPs</b> | <b><math>R^2</math> for SCZ</b> | <b>p value</b>  | <b>direction</b> |
|------------------------------|---------------------------|---------------------------------|-----------------|------------------|
| <b>MGS European-American</b> | 17,237                    | 0.57 %                          | $1.2 * 10^{-8}$ | negative         |
| <b>Japan</b>                 | 6,468                     | 0.52%                           | 0.017           | negative         |
| <b>Ashkenazi Jewish</b>      | 15,151                    | 0.25%                           | 0.010           | negative         |
| <b>MGS African-American</b>  | 17,382                    | 0.00 %                          | 0.591           | positive         |
| <b>Meta-analysis</b>         |                           |                                 | $4.0 * 10^{-9}$ | negative         |

**Supplementary Table 4. Examination of cognitive associations (in COGENT meta-analysis)  
for SNPs in the major histocompatibility complex (MHC) identified in published GWAS**

| Source                                 | SNP        | Region  | Position | Risk Allele<br>Freq. <sup>a</sup> | OR <sub>Sz</sub> <sup>a</sup> | COGENT<br>studies | P_COGENT<br>meta-analysis |
|----------------------------------------|------------|---------|----------|-----------------------------------|-------------------------------|-------------------|---------------------------|
| MGS/ISC Nature 2009                    | rs13194053 | 6p22.1  | 27143883 | 0.86                              | 1.22                          | 9                 | 0.2253                    |
| Decode Nature 2009                     | rs6932590  | 6p22.1  | 27248931 | 0.78                              | 1.16                          | 9                 | 0.9589                    |
| Bergen (Swe) Mol Psy 2012 <sup>b</sup> | rs17693963 | 6p22.1  | 27710165 | .92                               | 1.24                          | 9                 | 0.0975                    |
| Yue(China) Nat Gen 2011                | rs1635     | 6p22.1  | 28227604 | .058                              | 1.29                          | 3                 | 0.5565                    |
| Irish/WTCCC2 Biol Psy 2012             | rs2523722  | 6p22.1  | 30165273 | 0.737                             | 1.25                          | 9                 | 0.7947                    |
| Ripke (PGC) Nat Gen 2011               | rs2021722  | 6p22.1  | 30174131 | 0.78                              | 1.15                          | 9                 | 0.7365                    |
| Decode Nature 2009                     | rs3131296  | 6p21.32 | 32172993 | 0.87                              | 1.19                          | 6                 | 0.3666                    |

<sup>a</sup> based on source publication

Supplementary Figure 1. Q-Q plot depicting results of COGENT meta-analysis.

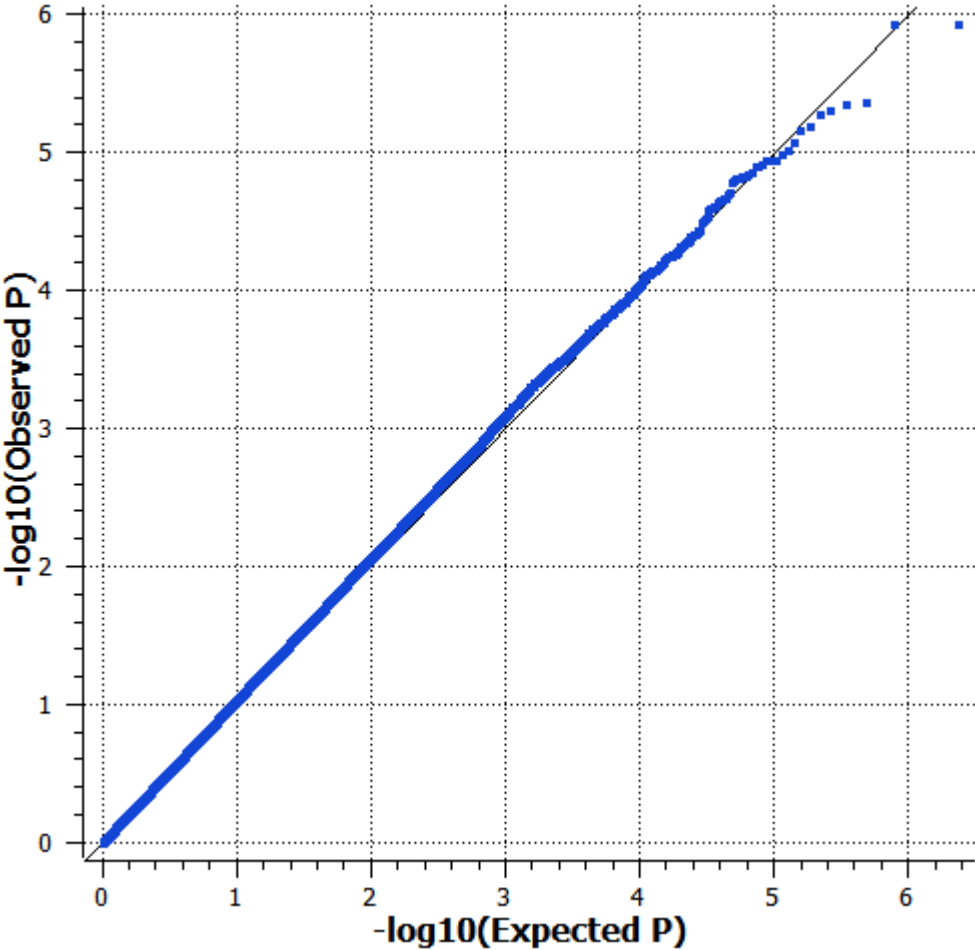

Supplement: NIHMS560312-supplement-01.pdf [file NIHMS560312-supplement-01.pdf]
